# Supplementary material
Source: ML conference proceedings conference paper supplement (https://proceedings.mlr.press/v80/chen18o.html)
Supplement: Supplementary file [file chen18o-supp.pdf]

# End-to-End Learning for the Deep Multivariate Probit Model

Di Chen<sup>1</sup> Yexiang Xue<sup>1</sup> Carla Gomes<sup>1</sup>

## 7. Appendix

**Theorem 1** Let  $\mu \in R^l$  and  $\Sigma \in R^{l \times l}$  be the rescaled mean and the rescaled residual covariance matrix of the random variable  $w^{(k)}$  in the equation (7) of the main text, then we have

$$\Pr \left[ \left| \frac{1}{M} \sum_{k=1}^M \prod_{j=1}^l \Phi(w_{i,j}^{(k)}) - \Pr(y_i|x_i) \right| \geq \epsilon \Pr(y_i|x_i) \right] \leq \frac{\Phi\left(0; \begin{bmatrix} -\mu \\ -\mu \end{bmatrix}, \begin{bmatrix} \Sigma+I & \Sigma \\ \Sigma & \Sigma+I \end{bmatrix}\right) - \Phi^2(0; -\mu, \Sigma+I)}{M\Phi^2(0; -\mu, \Sigma+I)\epsilon^2} \quad (1)$$

$$\leq \frac{\left(\frac{\Phi(0; -\mu, 2\Sigma+I)}{\Phi(0; -\mu, \Sigma+I)}\right)^2 |2\Sigma+I|^{1/2} - 1}{M\epsilon^2} \quad (2)$$

$$\leq \frac{\prod_{i=1}^l g(\mu_i)^2 |2\Sigma+I|^{1/2} - 1}{M\epsilon^2} \quad (3)$$

where  $g(\mu_i) = \max_x \frac{\Phi(\sqrt{2}x + \mu_i)}{\Phi(x + \mu_i)}$ . The function  $g(\mu_i)$  does not have a closed form but it is a monotonous decreasing function, which converges to 1 as  $\mu_i$  increases.

*Proof.* For the ease of expression, we omit the subscripts related to  $i$ -th data point in our proof. Without loss of generality, we can also assume the diagonal matrix  $V$  is an identity matrix. Defining  $\Pr(y|w) = \prod_{j=1}^n \Phi(w_j)$ ,  $\Pr(y|x) = E_{w \sim N(\mu, \Sigma)}[\Pr(y|w)]$ . We prove this convergence bound by analysing the first and second moment of random variable  $\Pr(y|w)$ .

$$\begin{aligned} E_w[\Pr(y|w)] &= \int_w \prod_{j=1}^n \Phi(w_j) Pr_w(w) dw \\ &= \int_w Pr_z(z \preceq w|w) Pr_w(w) dw \\ &= Pr_{z,w}(z \preceq w) \\ &= Pr_{z,w}(z - w \preceq 0) \end{aligned} \quad (4)$$

Here  $z \sim N(0, I)$  and  $a \preceq b$  means  $\forall a_i \leq b_i$

<sup>1</sup>Computer Science Department, Cornell University, Ithaca, NY, US 14850. Correspondence to: Di Chen <di@cs.cornell.edu>.

Since  $z$  is subject to multivariate gaussian distribution,  $z - w$  is still a multivariate gaussian random variable, which is subject to  $N(-\mu, \Sigma + I)$ . Thus,  $\Pr(y|x) = E_w[\Pr(y|w)] = \Phi(0; -\mu, \Sigma + I)$ . ( $\Phi(\cdot)$  denotes the cumulative function of multivariate gaussian distribution.)

Similarly, we can derive that

$$\begin{aligned} E[\Pr(y|w)^2] &= \Pr(z_1 \preceq w \wedge z_2 \preceq w) \\ &= \Pr\left(\begin{bmatrix} z_1 \\ z_2 \end{bmatrix} \preceq \begin{bmatrix} r \\ r \end{bmatrix}\right) \\ &= \Phi\left(0; \begin{bmatrix} -\mu \\ -\mu \end{bmatrix}, \begin{bmatrix} \Sigma+I & \Sigma \\ \Sigma & \Sigma+I \end{bmatrix}\right) \end{aligned}$$

Let  $B = \begin{bmatrix} \Sigma+I & \Sigma \\ \Sigma & \Sigma+I \end{bmatrix}$ , we have  $|B| = \left| \det \begin{pmatrix} 2\Sigma+I & \Sigma \\ 0 & I \end{pmatrix} \right| = |2\Sigma+I|$ . Since  $\Sigma$  is a positive definite matrix, we can decompose  $\Sigma = UDU^T$ , where  $U$  is an orthogonal matrix and  $D$  is a diagonal matrix. Similarly, we can decompose

$$B^{-1} = \begin{bmatrix} U & 0 \\ 0 & U \end{bmatrix} \begin{bmatrix} (2D+I)^{-1}(D+I) & -(2D+I)^{-1}D \\ -(2D+I)^{-1}D & (2D+I)^{-1}(D+I) \end{bmatrix} \begin{bmatrix} U^T & 0 \\ 0 & U^T \end{bmatrix}$$

Let  $x_1, x_2 \in R^l$ ,  $y_1 = U^T(x_1 + \mu)$ ,  $y_2 = U^T(x_2 + \mu)$  and  $D = \text{diag}(d_1, \dots, d_l)$ , then we have,

$$\begin{aligned} E[\Pr(y|r)^2] &= \Phi\left(0; \begin{bmatrix} -\mu \\ -\mu \end{bmatrix}, \begin{bmatrix} \Sigma+I & \Sigma \\ \Sigma & \Sigma+I \end{bmatrix}\right) \\ &= \frac{1}{(2\pi)^l |B|^{1/2}} \int_{(-\infty, 0]^l} e^{-\frac{1}{2}(\sum_{i=1}^l (y_{1,i}^2 + y_{2,i}^2) \frac{d_i+1}{2d_i+1} - 2\sum_{i=1}^l y_{1,i}y_{2,i} \frac{d_i}{2d_i+1})} dx_1 dx_2 \\ &\leq \frac{1}{(2\pi)^l |B|^{1/2}} \int_{(-\infty, 0]^l} e^{-\frac{1}{2}(\sum_{i=1}^l (y_{1,i}^2 + y_{2,i}^2) \frac{1}{2d_i+1})} dx_1 dx_2 \\ &= |2\Sigma+I|^{1/2} \Phi\left(0; \begin{bmatrix} -\mu \\ -\mu \end{bmatrix}, \begin{bmatrix} 2\Sigma+I & 0 \\ 0 & 2\Sigma+I \end{bmatrix}\right) \end{aligned}$$

Thus,

$$E[\Pr(y|r)^2]^{1/2} \leq |2\Sigma+I|^{1/4} \Phi(0; -\mu, 2\Sigma+I)$$

Using the inverse transformation in equation (4), we have

$$\begin{aligned} &\Phi(0; -\mu, 2\Sigma+I) \\ &= \frac{1}{(2\pi)^{l/2} |2\Sigma|^{1/2}} \int \prod \Phi(x) e^{\frac{1}{4}(x-\mu)^T \Sigma^{-1}(x-\mu)} dx \\ &= \frac{1}{(2\pi)^{l/2} |\Sigma|^{1/2}} \int \prod \Phi(\sqrt{2}y + \mu_i) e^{\frac{1}{2}y^T \Sigma^{-1}y} dy \end{aligned} \quad (5)$$

Let  $g(\mu_i) = \max_x \frac{\Phi(\sqrt{2}x + \mu_i)}{\Phi(x + \mu_i)}$ , then we have

$$\begin{aligned} & \Phi(0; -\mu, 2\Sigma + I) \\ &= \frac{1}{(2\pi)^{l/2} |\Sigma|^{1/2}} \int \prod \Phi(\sqrt{2}y + \mu) e^{\frac{1}{2}y^T \Sigma^{-1} y} dy \\ &\leq \frac{\prod_{i=1}^l g(\mu_i)}{(2\pi)^{l/2} |\Sigma|^{1/2}} \int \prod \Phi(y + \mu) e^{\frac{1}{2}y^T \Sigma^{-1} y} dy \\ &= \prod_{i=1}^l g(\mu_i) \Phi(\mu | \Sigma + I) \\ &= \prod_{i=1}^l g(\mu_i) \Pr(y|x) \end{aligned}$$

Therefore,

$$\begin{aligned} E[\Pr(y|w)^2]^{1/2} &\leq |2\Sigma + I|^{1/4} \Phi(0; -\mu, 2\Sigma + I) \\ &\leq |2\Sigma + I|^{1/4} \prod_{i=1}^l g(\mu_i) \Phi(0; -\mu, \Sigma + I) \end{aligned}$$

Using the Chebyshev's inequality, we have

$$\begin{aligned} & \Pr\left[\left|\frac{1}{M} \sum_{k=1}^M \prod_{j=1}^l \Phi(w_{i,j}^{(k)}) - \Pr(y_i|x_i)\right| \geq \epsilon \Pr(y_i|x_i)\right] \\ &= \Pr\left[\left|\frac{1}{M} \sum_{k=1}^M \Pr(y_i|w_i^{(k)}) - \Pr(y_i|x_i)\right| \geq \epsilon \Pr(y_i|x_i)\right] \\ &= \Pr\left[\left|\frac{1}{M} \sum_{k=1}^M \Pr(y_i|w_i^{(k)}) - \Pr(y_i|x_i)\right|^2 \geq \epsilon^2 \Pr(y_i|x_i)^2\right] \\ &\leq \frac{E\left[\left(\frac{1}{M} \sum_{k=1}^M \Pr(y_i|w_i^{(k)}) - \Pr(y_i|x_i)\right)^2\right]}{\epsilon^2 \Pr(y_i|x_i)^2} \\ &= \frac{\prod_{i=1}^l g^2(\mu_i) |2\Sigma + I|^{1/2} - 1}{M\epsilon^2} \quad \blacksquare \end{aligned}$$

The function  $g(\mu_i)$  does not have a closed form but it is a monotonous decreasing function, which converges to 1 as  $\mu_i$  increases. The figure (1) is the visualization of function

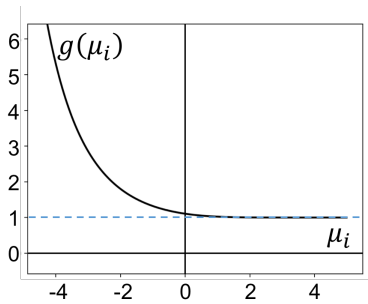

Figure 1. The visualization of function  $g(\mu_i)$ .

$g(\mu_i)$ . As you see, the function  $g(\mu_i)$  is very close to 1

when  $\mu_i$  is positive. The following lemma provides a more analytical upper bound for function  $g(\mu_i)$ .

**Lemma 1** For any  $y$ ,  $\Phi(\sqrt{2}y + \mu) \leq g(\mu)\Phi(y + \mu)$ , where

$$g(\mu) \leq \begin{cases} \sqrt{2}e^{\frac{3-2\sqrt{2}}{2}\mu^2} & \text{if } \mu < 0 \\ 1.182 & \text{if } \mu \geq 0 \end{cases}$$

*Proof.*  $\frac{\Phi(\sqrt{2}y + \mu)}{\Phi(y + \mu)}$  achieves the maximum when its derivative is equal to zero, i.e.,

$$\begin{aligned} & \left(\frac{\Phi(\sqrt{2}y + \mu)}{\Phi(y + \mu)}\right)' = 0 \implies \\ & \frac{\frac{1}{\sqrt{2\pi}}(\sqrt{2}e^{-\frac{1}{2}(\sqrt{2}y + \mu)^2} \Phi(y + \mu) - e^{-\frac{1}{2}(y + \mu)^2} \Phi(\sqrt{2}y + \mu))}{\Phi^2(y + \mu)} = 0 \\ & \implies \frac{\Phi(\sqrt{2}y + \mu)}{\Phi(y + \mu)} = \sqrt{2}e^{-\frac{1}{2}(y^2 + 2(\sqrt{2}-1)\mu y)} \end{aligned}$$

Since  $\Phi(x)$  is a monotonic increasing function,  $\max_y \sqrt{2}e^{-\frac{1}{2}(y^2 + 2(\sqrt{2}-1)\mu y)} = \sqrt{2}e^{\frac{3-2\sqrt{2}}{2}\mu^2}$  when  $\mu < 0$ . Similarly, when  $\mu \geq 0$ , we know  $y^* = \operatorname{argmax}_y \frac{\Phi(\sqrt{2}y + \mu)}{\Phi(y + \mu)} \geq 0$ . Thus,  $\Phi(y^* + \mu) \geq \frac{1}{2}$ . By analysing the maximal value of  $\Phi(\sqrt{2}y + \mu) - \Phi(y + \mu)$  as well as the fact that  $\Phi(\sqrt{2}y + \mu) - \Phi(y + \mu) \leq (\sqrt{2} - 1)y * \frac{1}{\sqrt{2\pi}}e^{-\frac{1}{2}(y + \mu)^2}$ , we could know that  $\Phi(\sqrt{2}y + \mu) - \Phi(y + \mu) \leq 0.091$ . That is,

$$g(\mu) \leq \begin{cases} \sqrt{2}e^{\frac{3-2\sqrt{2}}{2}\mu^2} & \text{if } \mu < 0 \\ 1.182 & \text{if } \mu \geq 0 \end{cases}$$

**Theorem 2** Let  $\mu \in R^l$  and  $\Sigma \in R^{l \times l}$  be the rescaled mean and rescaled residual covariance matrix of the random variable  $w^{(k)}$  in equation (7) of the main text, we have

$$\begin{aligned} & \Pr\left[\left|\frac{\partial \frac{1}{M} \sum_{k=1}^M \prod_{j=1}^l \Phi(w_{i,j}^{(k)})}{\partial \mu_i} - \frac{\partial \Pr(y_i|x_i)}{\partial \mu_i}\right| \geq \epsilon \frac{\partial \Pr(y_i|x_i)}{\partial \mu_i}\right] \\ & \leq \frac{e^{\frac{\mu_i^2}{2(\Sigma_{i,i} + 1)}} (\Sigma_{i,i} + 1) \lambda_{\max} \prod_{j \neq i}^l g(\mu_j')^2 |2\Sigma + I|^{1/2} - 1}{M\epsilon^2} \quad (6) \end{aligned}$$

Here  $\lambda_{\max}$  denotes the largest eigenvalue of  $\Sigma$  and  $\mu' = \mu - \frac{\mu_i}{v+1} \Sigma^{1/2} b_i$ . ( $b_i$  denotes the  $i$ -th row of  $\Sigma_{1/2}$ .)

*Proof.* For the ease of symbolism, we omit all the subscript

$i$  related to the index of  $i$ -th data point. For any  $1 \leq i \leq l$ ,

$$\begin{aligned} \frac{\partial \Pr(y|x)}{\partial \mu_i} &= E_{w \sim N(\mu, \Sigma)} \left[ \frac{\partial \prod_{j=1}^l \Phi(w_j)}{\partial \mu_i} \right] \\ &= \int \prod_{j \neq i}^l \Phi(w_j) * \phi(w_i) \phi(w|\mu, \Sigma) dw \\ &= \int \prod_{j \neq i}^l \Phi(\Sigma_j^{1/2} x + \mu_j) * \phi(\Sigma_i^{1/2} x + \mu_i) \phi(x|0, I) dx \end{aligned}$$

Let  $B = \Sigma^{1/2}$  and let  $b_j$  denote the  $j$ -th row of  $B$ .

$$\begin{aligned} &= \int \prod_{j \neq i}^l \Phi(b_j^T x + \mu_j) * \phi(b_i^T x + \mu_i) \phi(x|0, I) dx \\ \text{let } v &= b_i^T b_i = \Sigma_{i,i} \text{ and } C = I - \frac{b_i b_i^T}{v+1} \quad (C^{-1} = I + b_i b_i^T) \\ &= \phi\left(\frac{\mu_i}{v+1}\right) * |C|^{1/2} \int \prod_{j \neq i}^l \Phi(b_j^T x + \mu_j) * \phi(x | -\frac{\mu_i}{v+1} b_i, C) dx \\ &= \phi\left(\frac{\mu_i}{v+1}\right) * |C|^{1/2} * \Pr(\forall j \neq i, z_j \leq b_j^T x + \mu_j) \\ &\text{(where } x \sim N(-\frac{\mu_i}{v+1} b_i, C) \text{ and } z \sim N(0, I).) \\ &= \phi\left(\frac{\mu_i}{v+1}\right) * |C|^{1/2} * \Pr(z \leq w) \end{aligned}$$

(where  $w \sim N(\mu_{-i} - \frac{\mu_i}{v+1} B_{-i} b_i, B_{-i} C B_{-i}^T)$ ,  $\mu_{-i} \in R^{l-1}$  denotes the vector derived from  $\mu$  by eliminating the  $i$ -th entry.  $B_{-i} \in R^{(l-1) \times l}$  denotes the matrix derived from  $B$  by eliminating the  $i$ -th row.)

Thus, using the transformation above, we can transform the derivative in terms of  $\mu_i$  into the form similar to theorem (1). Because  $B_{-i} C B_{-i}^T = B_{-i} B_{-i}^T - \frac{(B_{-i} b_i)(B_{-i} b_i)^T}{v+1}$ , where  $B_{-i} B_{-i}^T$  is a principal submatrix of  $\Sigma$ , whose eigenvalues are interlaced with the eigenvalues of  $\Sigma$ , and  $\frac{(B_{-i} b_i)(B_{-i} b_i)^T}{v+1}$  is a rank-1 matrix, we have  $|2B_{-i} C B_{-i}^T + I| \leq |2\Sigma + I| * \lambda_{max}$ .

In terms of the second moment of the derivative of  $\mu_i$ , we have,

$$\begin{aligned} E_{w \sim N(\mu, \Sigma)} &\left[ \left( \frac{\partial \prod_{j=1}^l \Phi(w_j)}{\partial \mu_i} \right)^2 \right] \\ &= \int \prod_{j \neq i}^l \Phi^2(\Sigma_j^{1/2} x + \mu_j) * \phi^2(\Sigma_i^{1/2} x + \mu_i) \phi(x|0, I) dx \\ &\leq \int \prod_{j \neq i}^l \Phi^2(\Sigma_j^{1/2} x + \mu_j) * \phi(\Sigma_i^{1/2} x + \mu_i) \phi(x|0, I) dx \\ &= \phi\left(\frac{\mu_i}{v+1}\right) * |C|^{1/2} \int \prod_{j \neq i}^l \Phi^2(b_j^T x + \mu_j) * \phi(x | -\frac{\mu_i}{v+1} b_i, C) dx \\ &= \phi\left(\frac{\mu_i}{v+1}\right) * |C|^{1/2} * \Pr(z^1 \leq w \wedge z^2 \leq w) \end{aligned}$$

Here we use the same notation as the proof above.

Using the similar trick as theorem (1), we have

$$\begin{aligned} \Pr &\left[ \left| \frac{\partial \frac{1}{M} \sum_{k=1}^M \prod_{j=1}^l \Phi(w_{i,j}^k)}{\partial \mu_i} - \frac{\partial \Pr(y_i|x_i)}{\partial \mu_i} \right| \geq \epsilon \frac{\partial \Pr(y_i|x_i)}{\partial \mu_i} \right] \\ &\leq \frac{e^{\frac{\mu_i^2}{2(v+1)}} |C^{-1}| \lambda_{max} \prod_{j \neq i}^l g(\mu_j')^2 |2\Sigma + I|^{1/2} - 1}{M \epsilon^2} \\ &\leq \frac{e^{\frac{\mu_i^2}{2(\Sigma_{i,i} + 1)}} (\Sigma_{i,i} + 1) \lambda_{max} \prod_{j \neq i}^l g(\mu_j')^2 |2\Sigma + I|^{1/2} - 1}{M \epsilon^2} \end{aligned}$$

Here  $\mu_j' = \mu - \frac{\mu_i}{v+1} \Sigma^{1/2} b_i$ .

In this way, we bound the convergence of the derivatives in terms of  $\mu$ , so that the derivatives in term of the parameters in feature network can be derived by chain rule. However, because the derivatives of  $\Sigma^{1/2}$  could be negative or zero, we can not apply the Chebyshev's inequality to have a similar multiplicative error bound. Nevertheless, because all the data points share a global residual covariance matrix, empirical experiments show that  $\Sigma^{1/2}$  converges well on all the datasets.

Here we show that the variance of our sampling process is strictly lower than the rejection sampling.

**Theorem 3** *Here we follow the notation of equation(7) in the main paper. Let  $\theta_1$  be the reject sampling estimator of  $\Phi(0; -\mu, \Sigma)$ , where  $E[\theta_1] = E_{r \sim N(0, \Sigma)}[I\{r \preceq \mu\}]$ . Let  $\theta_2$  be the estimator of DMVP's sampling process, where  $E[\theta_2] = E_{w \sim N(0, \Sigma_r)}[\Pr(z \preceq (w + \mu)|w)]$  and  $z \sim N(0, V)$ . We have  $Var[\theta_2] < Var[\theta_1]$ .*

*Proof.*

$$\begin{aligned} Var[\theta_2] &= E[(\theta_2 - E[\theta_2])^2] \\ &= E_{w \sim N(0, \Sigma_r)}[(\Pr(z \preceq (w + \mu)|w) - E[\theta_2])^2] \\ &= E_{w \sim N(0, \Sigma_r)}[(E_{z \sim N(0, V)}[I\{z \preceq (w + \mu)\} - E[\theta_2]|w])^2] \\ &< E_{w \sim N(0, \Sigma_r)}[E_{z \sim N(0, V)}[(I\{z \preceq (w + \mu)\} - E[\theta_2])^2|w]] \\ &= E_{r \sim N(0, \Sigma)}[(I\{r \preceq \mu\} - E[\theta_1])^2] \\ &\quad \text{(Here } r = z - w \text{ and } E[\theta_1] = E[\theta_2]) \\ &= E[(\theta_1 - E[\theta_1])^2] = Var[\theta_1] \end{aligned}$$

*The inequality follows the fact that  $E[x^2] > E[x]^2$  given  $Var[x] \neq 0$ .*
